# Supplementary material for: SPARC from Young CSF Rejuvenates aged Skull Bone Marrow by targeting neutrophil-derived MMP25
Source: Research Square preprint supplement (doi:10.21203/rs.3.rs-8242292/v1), 2026-01-21
Supplement: Supplementary file 1 [file f550b10edab6a994968fcc0e.pdf]

## Supplementary information

**Extended Data Video 1** *Ex vivo* two-photon imaging of skull BM at 7 days after IC injection of AF488-OVA-labeled yCSF. Intravenous (IV) injection of CD31 labeled vasculature. Scale bar, 147.3  $\mu\text{m}$ .

**Extended Data Table 1** Primers used for genotyping.

| Gene              | Primer sequence (5'-3')  |
|-------------------|--------------------------|
| tdTomato P1       | AAGGGAGCTGCAGTGGAGTA     |
| tdTomato P2       | CCGAAAATCTGTGGGAAGTC     |
| tdTomato P3       | GGCATTAAAGCAGCGTATCC     |
| tdTomato P4       | CTG TTCCTGTACGGCATGG     |
| Pdgfra-CreERT2 P1 | TGCTCAA AACCATCTTCTCCTTC |
| Pdgfra-CreERT2 P2 | TGGGACATGCTTCCACTGAC     |
| Pdgfra-CreERT2 P3 | CGCGCGCCTGAAGATATAGA     |
| Mmp25 flox P1     | ACCCGCAACTGGGATCACACA    |
| Mmp25 flox P2     | ACACAATCATGGCCCCTATCCC   |
| Mmp25 flox P3     | ACGCCCAGATGCAGAGTCTTG    |
| Mmp25 flox P4     | GGGACCAGATTTGTTCTGTCCC   |

**Extended Data Table 2** Primers used for quantitative qPCR analysis.

| Gene                                   | Primer sequence (5'-3')       |
|----------------------------------------|-------------------------------|
| <i>MMP25</i> (human)                   | F: CATTATGAGGCCCTTCTACCAGG    |
|                                        | R: CGCCTTCCCATAGAGTTGCTG      |
| <i>RUNX2</i> (human)                   | F: TCTTAGAACAAATTCTGCCCTTT    |
|                                        | R: TGCTTTGGTCTTGAAATCACA      |
| <i>IL6</i> (human)                     | F: CGCAACAACATCATCTCATTCTGCG  |
|                                        | R: CATGCTACATTGCGGAAGAGC      |
| <i>PPAR<math>\gamma</math></i> (human) | F: CGAGACCAACAGCTTCTCCTTCTCG  |
|                                        | R: TTTCAGAAATGCCTTGCAGTGG     |
| <i>LPL</i> (human)                     | F: CGGATTAACATTGGAGAAGCTATCCG |
|                                        | R: AGCTGGTCCACATCTCCAAGTC     |
| <i>P16</i> (human)                     | F: GATCCAGGTGGGTAGAAGGTC      |
|                                        | R: CCCCTGCAAACCTTCGTCCT       |
| <i>P21</i> (human)                     | F: CGATGGAACTTCGACTTTGTCA     |
|                                        | R: GCACAAGGGTACAAGACAGTG      |
| <i>IL1B</i> (human)                    | F: TTCGACACATGGGATAACGAGG     |
|                                        | R: TTTTGTGCTGTGAGTCCCGGAG     |
| <i>OCN</i> (human)                     | F: AGCAAAGGTGCAGCCTTTGT       |
|                                        | R: GCGCCTGGGTCTCTTCACT        |
| <i>PU.1</i> (human)                    | F: GACACGGATCTATACCAACGCC     |
|                                        | R: CCGTGAAGTTGTTCTCGGCGAA     |
| <i>GAPDH</i> (human)                   | F: CTGGGCTACACTGAGCACC        |
|                                        | R: AAGTGGTCGTTGAGGGCAATG      |
| <i>Mmp25</i> (mouse)                   | F: TGGAATGGCTGACTCGCTATG      |
|                                        | R: GCATGACTTTGATTGCATCCTG     |
| <i>P16</i> (mouse)                     | F: CGCAGGTTCTTGGTCACTGT       |
|                                        | R: TG TTCACGAAAGCCAGAGCG      |
| <i>P21</i> (mouse)                     | F: CCTGGTGATGTCCGACCTG        |
|                                        | R: CCATGAGCGCATCGCAATC        |
| <i>PU.1</i> (mouse)                    | F: TTCAGAGCTATACCAACGTCCA     |
|                                        | R: TGATCGCTATGGCTTTCTCCA      |
| <i>Gapdh</i> (mouse)                   | F: AGCCCAGAACATCATCCCTG       |
|                                        | R: CACCACCTTCTTGATGTCATC      |

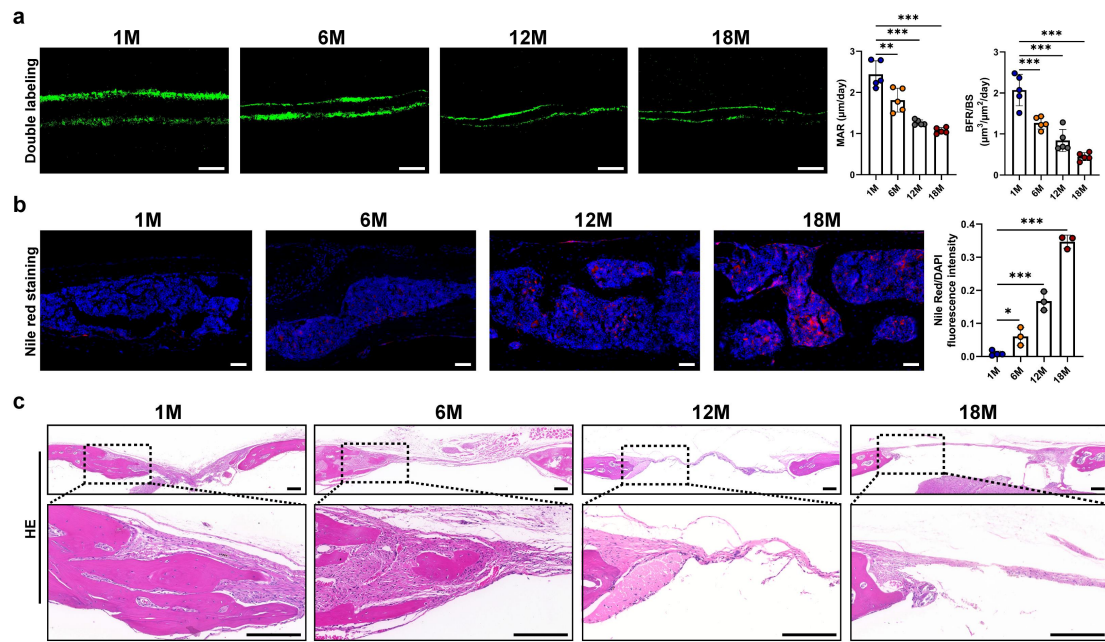

**Figure S1 (related to Figure 1). Age-related changes in skull bone formation and marrow adiposity**

**(a)** Representative images (left) of calcein double labeling in parietal bone from 1M, 6M, 12M, and 18M mice, and quantification of MAR and BFR (right).  $n = 5$ . Scale bar, 20  $\mu\text{m}$ .

**(b)** Nile red staining of lipids (red) in the skull BM from mice of different ages. Quantification of the Nile red fluorescence intensity is shown on the right.  $n = 3$ . Scale bar, 50  $\mu\text{m}$ .

**(c)** Representative H&E staining of calvarial defects 8 weeks after surgery in 1M, 6M, 12M, and 18M mice. Scale bar, 200  $\mu\text{m}$ .

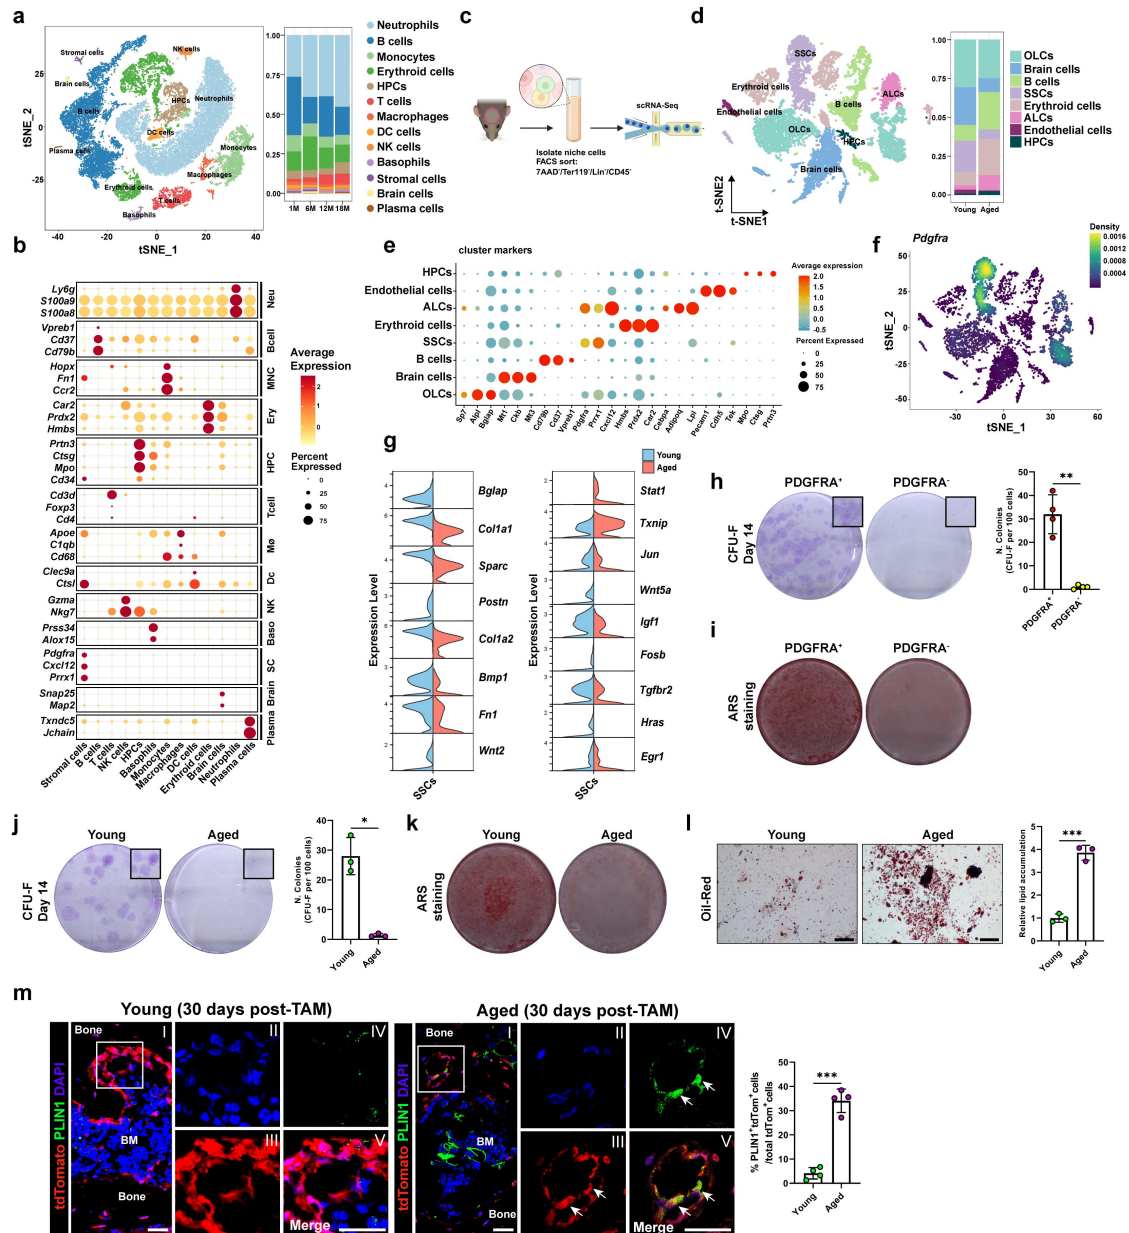

**Figure S2 (related to Figure 1). Characterization and age-related changes of PDGFRA<sup>+</sup> SSCs**

(a) scRNA-seq analysis of skull BM cells from 1M, 6M, 12M, and 18M mice. t-distributed stochastic neighbor embedding (t-SNE) visualization showing distinct cell populations color-coded by cell type (left) and quantification of cell proportions (right). HPCs: hematopoietic progenitor cells.

**(b)** Gene expression dotplots showing cell-type specific markers in skull BM cells.

**(c)** Experimental strategy for single-cell transcriptomic analysis of skull BM cells.

Created in BioRender.

**(d)** t-SNE visualization of scRNA-seq data from young (1M) and aged (12M) 7AAD<sup>-</sup>/Ter119<sup>-</sup>/Lin<sup>-</sup>/CD45<sup>-</sup> cells showing distinct cell populations color-coded by cell type (left) and quantification of cell proportions (right). Cell populations include skeletal stem cells (SSCs), osteogenic lineage cells (OLCs), adipogenic lineage cells (ALCs), HPCs, B cells, brain cells, erythroid cells, and endothelial cells.

**(e)** Gene expression dotplot showing cluster-defining marker genes across identified cell populations.

**(f)** t-SNE visualization showing *Pdgfra* expression distribution in cells from young (1M) mice. Color intensity represents expression density of the *Pdgfra* gene across the identified cell populations.

**(g)** Transcriptional Profiles of Proliferation, Apoptosis, and Osteogenesis in SSCs between Young and Aged Mice.

**(h)** CFU-F analysis and quantification of PDGFRA<sup>+</sup> and PDGFRA<sup>-</sup> populations.  $n = 4$ .

**(i)** ARS staining of osteogenic differentiation from PDGFRA<sup>+</sup> and PDGFRA<sup>-</sup> cells.

**(j)** CFU-F analysis and quantification of young (1M) and aged (12M) PDGFRA<sup>+</sup> SSCs.  $n = 3$ .

**(k)** ARS staining of osteogenic differentiation of young (1M) and aged (12M) PDGFRA<sup>+</sup> SSCs.

**(l)** Oil Red O staining and quantification of adipogenic differentiation of young (1M) and aged (12M) PDGFRA<sup>+</sup> SSCs. *n* = 3. Scale bar, 100  $\mu$ m.

**(m)** Immunofluorescence staining of Perilipin 1 (PLIN1) in skull bone sections from young (1M) and aged (12M) *Pdgfra-CreER<sup>T2</sup>tdTomato* mice at 30 days post-tamoxifen induction. Representative images are shown (left) and quantification of PLIN1<sup>+</sup> tdTomato<sup>+</sup> double-positive cells as a percentage of total tdTomato<sup>+</sup> cells is presented (right). *n* = 4. Scale bar, 25  $\mu$ m.

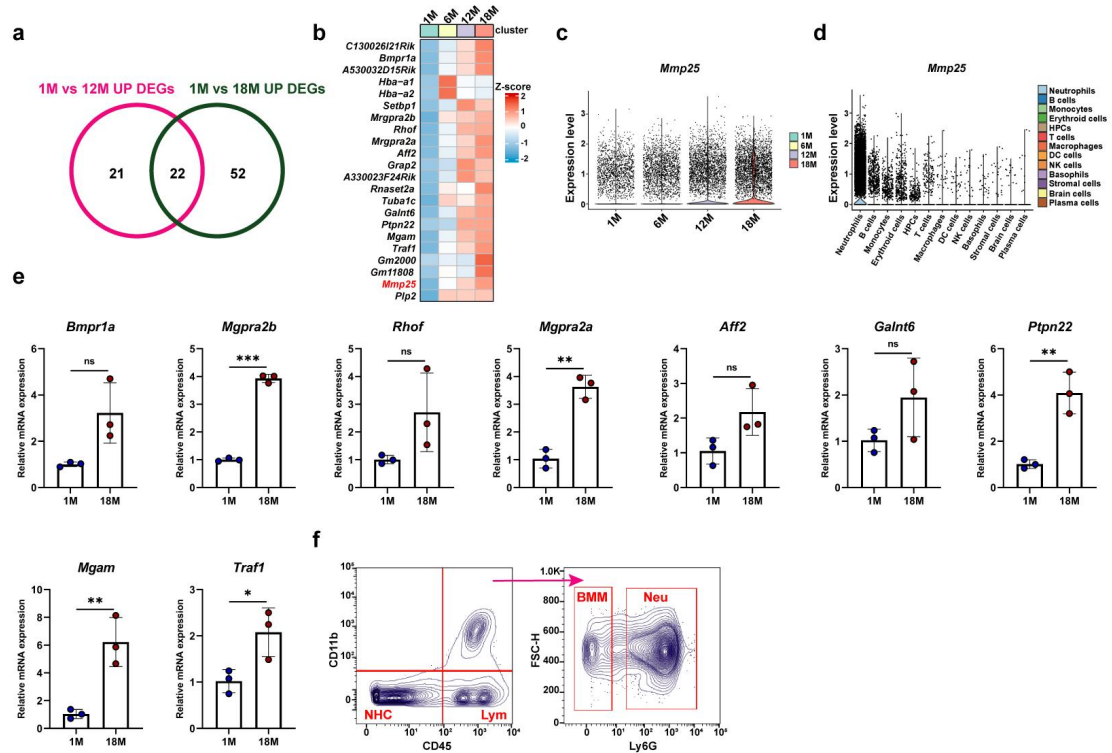

**Figure S3 (related to Figure 2). Single-cell transcriptomic analysis identifies neutrophil-derived *Mmp25* as an age-associated inflammatory gene**

**(a)** Venn diagram showing the overlap of upregulated differentially expressed genes (DEGs) in skull BM cells from aged (12M and 18M) mice compared to young (1M) mice, as identified by scRNA-seq analysis. DEGs were identified using criteria of  $\log_2FC > 1.3$  and adjusted  $p < 0.05$  from scRNA-seq analysis.

**(b)** Heatmap showing expression patterns of 22 overlapping DEGs in skull BM cells from mice of different ages (1M, 6M, 12M, and 18M).

**(c-d)** Violin plots showing the expression of *Mmp25* in skull BM from mice of different ages (c) and across different cell populations (d).

**(e)** qPCR validation of DEGs identified in (b).  $n = 3$ .

**(f)** Representative flow cytometry plots showing the gating strategy for identifying the NHC, Lym, BMM, and Neu populations.



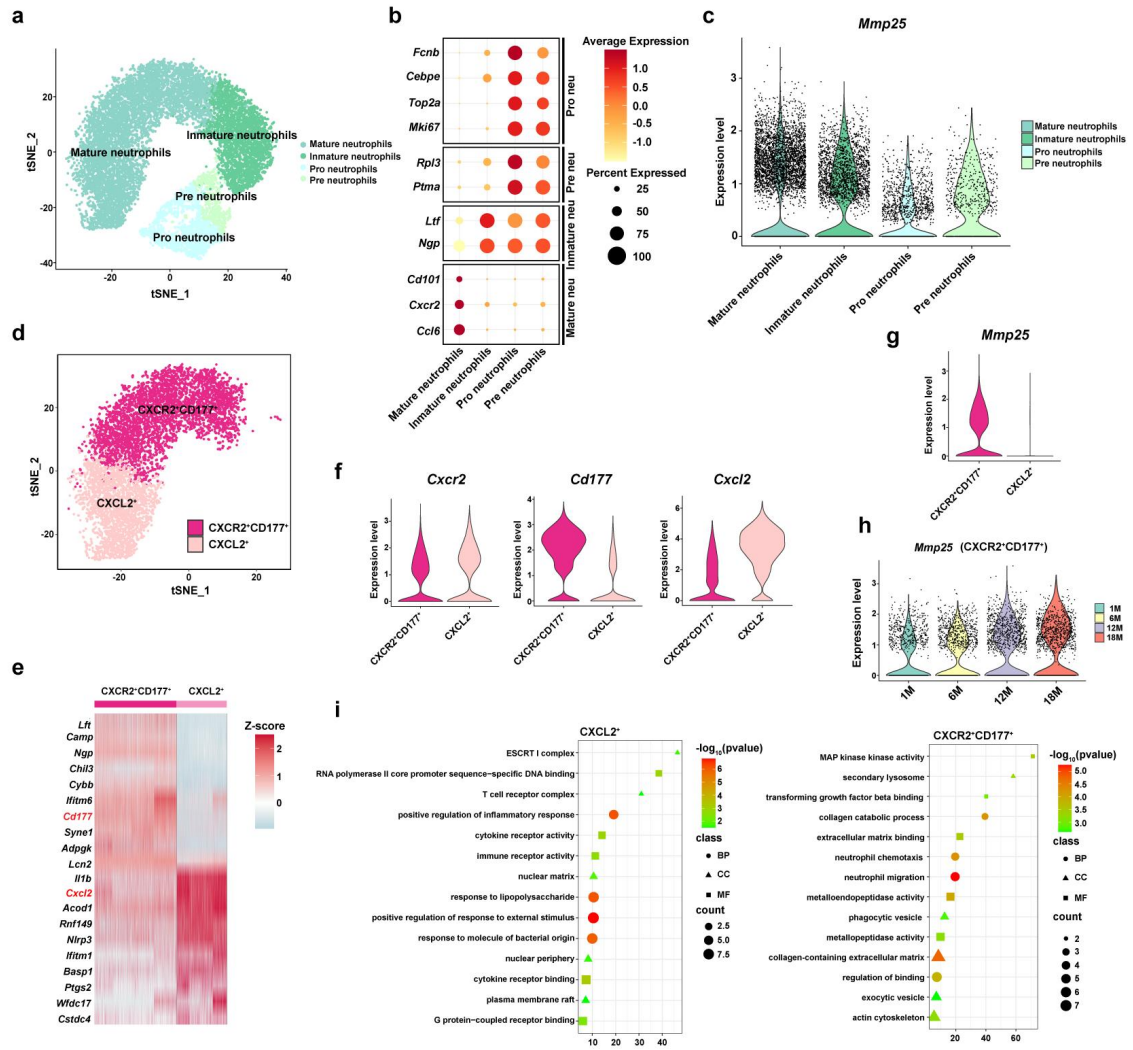

**Figure S4 (related to Figure 2). Single-cell analysis identifies an age-accumulating CXCR2<sup>+</sup>CD177<sup>+</sup> neutrophil subset with high *Mmp25* expression**

**(a)** t-SNE plot of neutrophil subsets isolated from mice with different ages (1M, 6M, 12M and 18M).

**(b)** Dotplot analysis of subset-specific marker genes defining neutrophil subsets.

**(c)** Violin plots showing expression of *Mmp25* across different neutrophil subsets.

**(d)** t-SNE visualization showing CXCL2<sup>+</sup> and CXCR2<sup>+</sup>CD177<sup>+</sup> mature neutrophil

subsets.

**(e)** Gene expression heatmap of top 10 genes expressed in mature neutrophil subsets.

**(f)** Violin plots showing the expression of *Cxcr2*, *Cd177*, and *Cxcl2* in CXCL2<sup>+</sup> and CXCR2<sup>+</sup>CD177<sup>+</sup> mature neutrophil subsets.

**(g)** Violin plots showing enriched *Mmp25* expression in CXCR2<sup>+</sup>CD177<sup>+</sup> versus CXCL2<sup>+</sup> neutrophil subsets.

**(h)** Violin plots showing increased expression of *Mmp25* with age in CXCR2<sup>+</sup>CD177<sup>+</sup> neutrophil subsets.

**(i)** Gene Ontology enrichment analysis revealed distinct functional signatures of CXCL2<sup>+</sup> (left) and CXCR2<sup>+</sup>CD177<sup>+</sup> (right) neutrophil subsets.

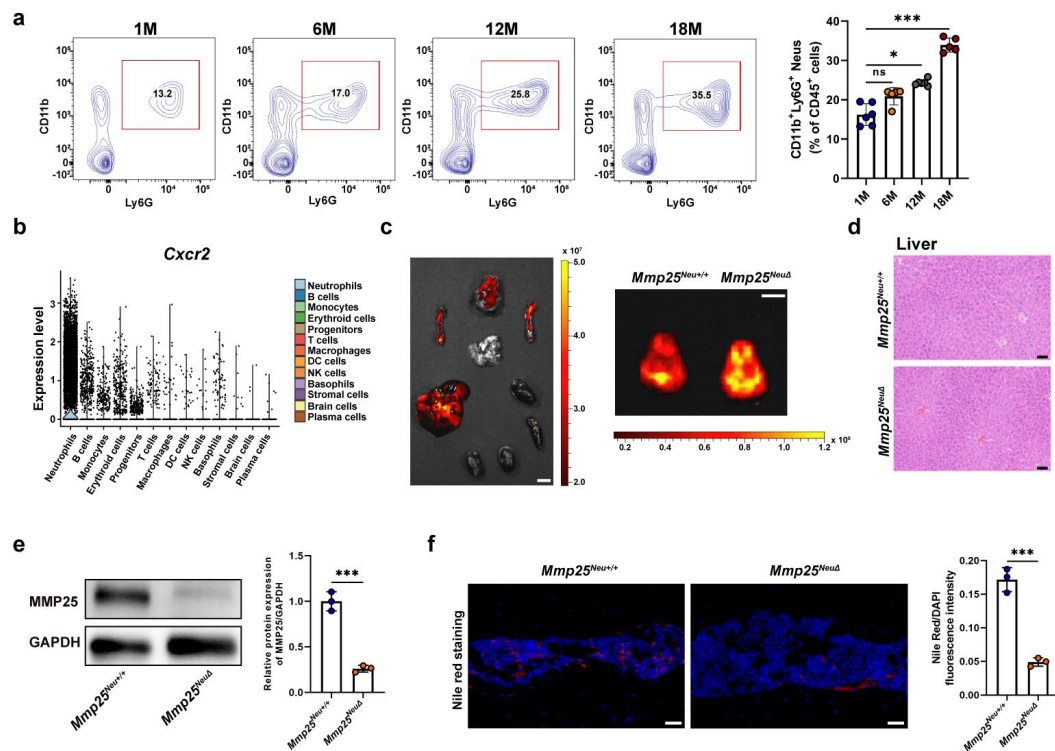

**Figure S5 (related to Figure 2). Validation of the AAV9-*Cxcr2* system and age-associated accumulation of MMP25-expressing neutrophils in skull BM**

**(a)** Representative flow cytometry plots showing age-dependent increases in CD11b<sup>+</sup>Ly6G<sup>+</sup> neutrophils from skull BM of 1M, 6M, 12M, and 18M groups (left) and quantification of neutrophil frequency (right). *n* = 6 mice in the 1M and 12M groups; *n* = 5 mice in the 6M and 18M groups.

**(b)** Violin plots showing the expression of *Cxcr2* across different cell populations in skull BM.

**(c)** *In vivo* fluorescence imaging showing the biodistribution of AAV9-*Cxcr2*-eGFP in mice following systemic administration. Fluorescent signals were predominantly detected in skeletal tissues, especially in craniofacial bones. Scale bars, 1 cm.

**(d)** Representative H&E staining of liver sections from *Mmp25<sup>Neu+/+</sup>* and *Mmp25<sup>NeuΔ</sup>* mice. Scale bars, 50 μm.

**(e)** Western blot analysis showing MMP25 protein levels in neutrophils from *Mmp25<sup>Neu+/+</sup>* and *Mmp25<sup>NeuΔ</sup>* mice. *n* = 3.

**(f)** Nile red staining and quantification of lipids in skull BM from *Mmp25<sup>Neu+/+</sup>* and *Mmp25<sup>NeuΔ</sup>* mice. *n* = 3. Scale bar, 50 μm.

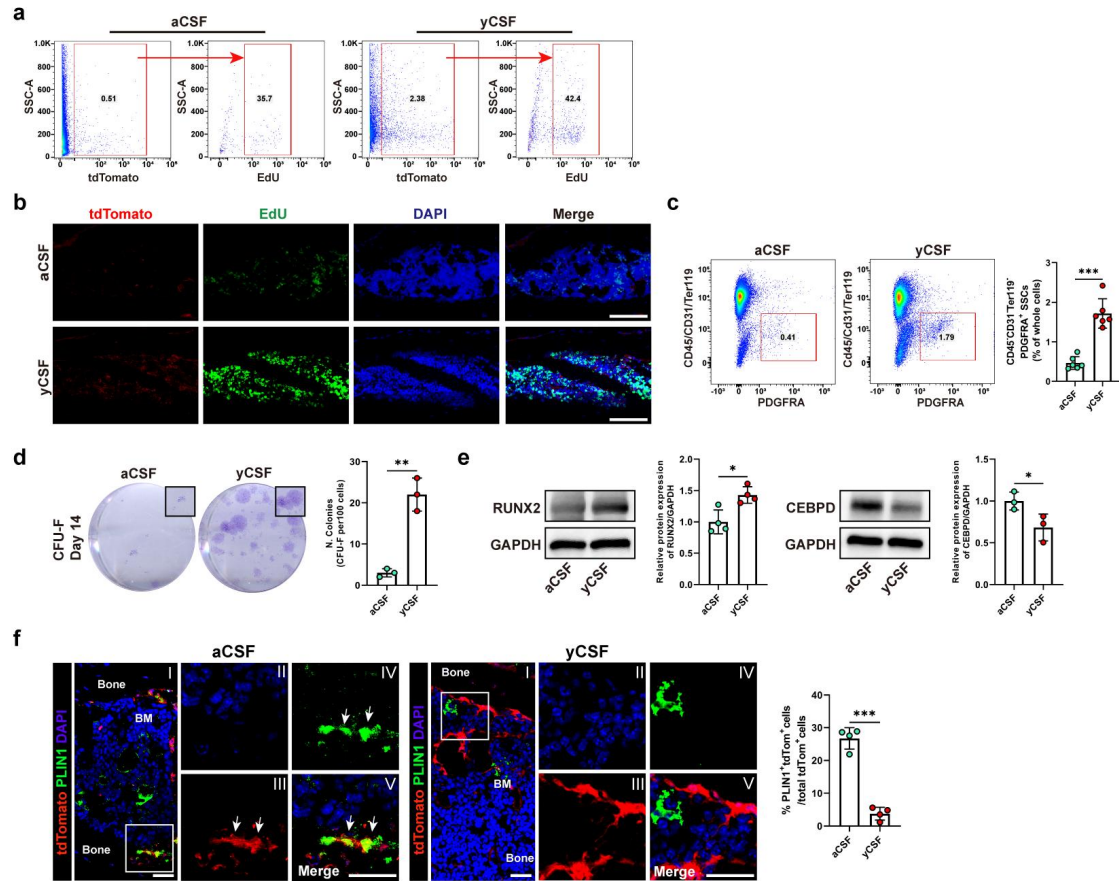

**Figure S6 (related to Figure 4). yCSF promotes proliferation and osteogenic differentiation of PDGFRA<sup>+</sup> SSCs**

**(a)** Representative flow cytometry plots showing tdTomato<sup>+</sup> and EdU<sup>+</sup> cells in *Pdgfra-CreER<sup>T2</sup>tdTomato* mice 72 hours after aCSF or yCSF treatment.

**(b)** Representative immunofluorescence images showing EdU<sup>+</sup> cells (green) and tdTomato<sup>+</sup> cells (red) in the skull BM from aged (12M) *Pdgfra-CreER<sup>T2</sup>tdTomato* mice 72 h after aCSF or yCSF treatment. Scale bar, 100  $\mu$ m.

**(c)** Flow cytometry analysis and quantification of PDGFRA<sup>+</sup> SSCs in skull BM from aged (12M) mice 7 days after aCSF or yCSF treatment. *n* = 6.

**(d)** CFU-F analysis and quantification of PDGFRA<sup>+</sup> SSCs isolated from aged (12M)

mice 7 days after aCSF or yCSF treatment.  $n = 3$ .

**(e)** Western blot analysis and quantification of RUNX2 and CEBPD expression in PDGFRA<sup>+</sup> SSCs isolated from aged (12M) mice 7 days after aCSF or yCSF treatment.  $n = 4$  for RUNX2, and  $n = 3$  for CEBPD.

**(f)** Representative immunofluorescence images of skull BM sections from aCSF- or yCSF-treated aged (12M) *Pdgfra-CreER<sup>T2</sup>tdTomato* mice showing PLIN1 expression (green) in tdTomato<sup>+</sup> cells (red). quantification of PLIN1<sup>+</sup>tdTomato<sup>+</sup> double-positive cells as a percentage of total tdTomato<sup>+</sup> cells is presented (right).  $n = 4$ . Scale bar, 25  $\mu\text{m}$ .

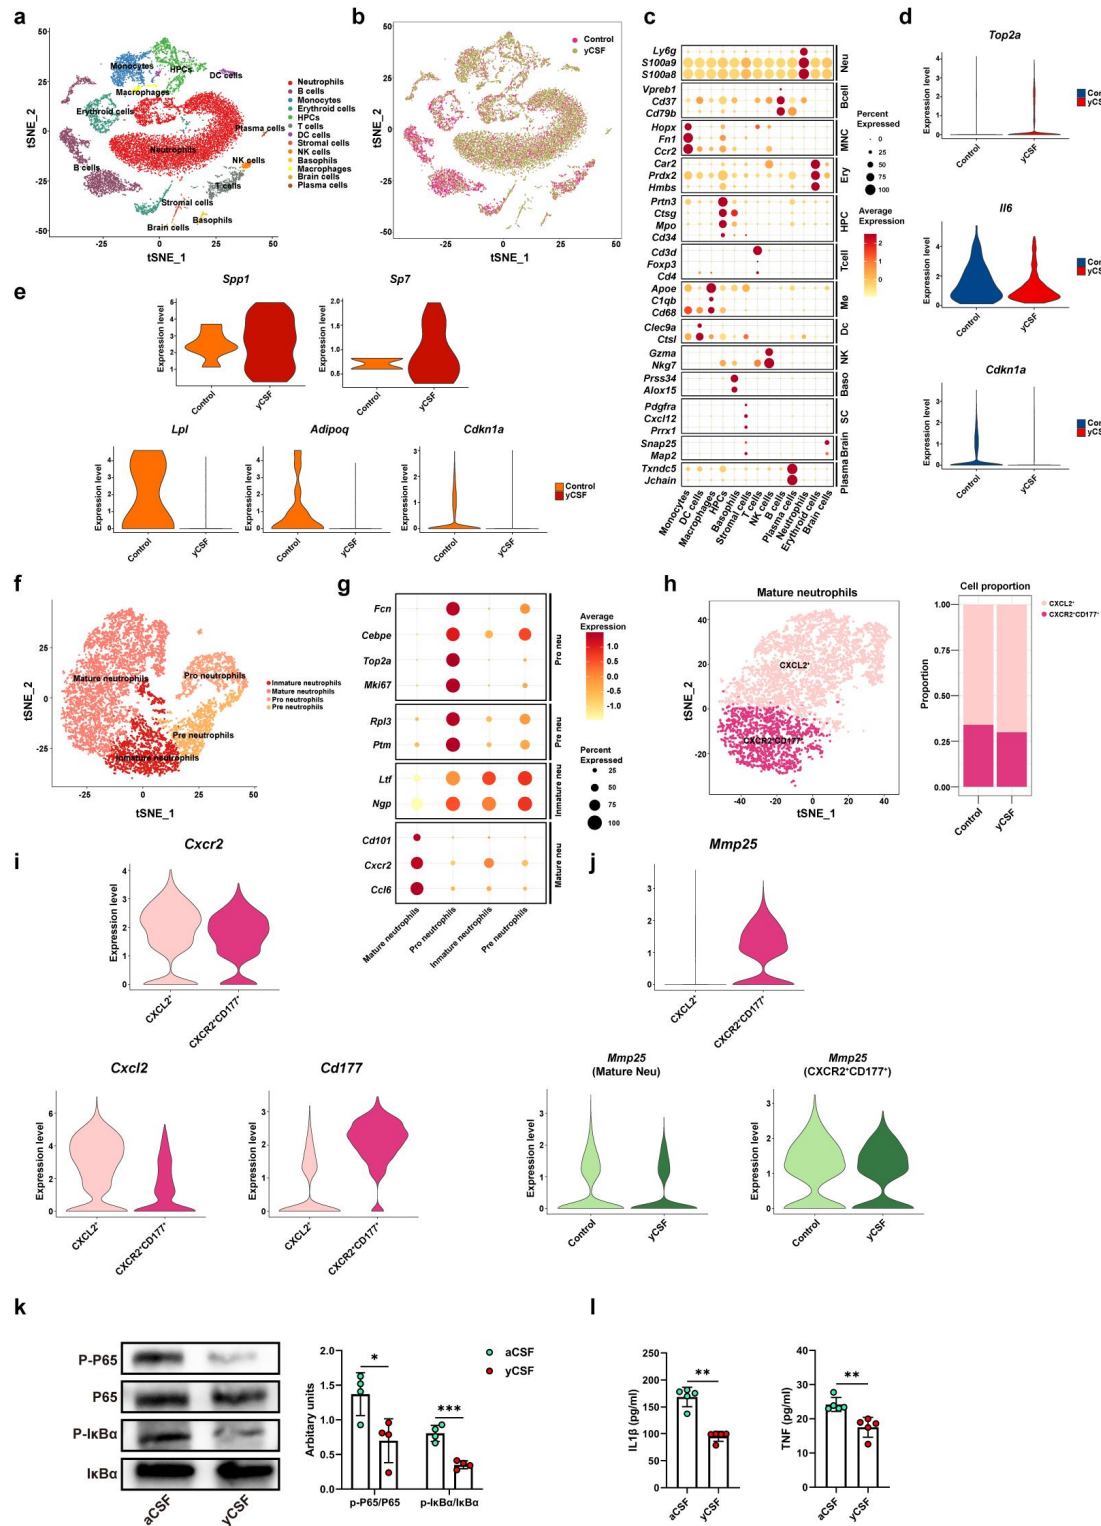

**Figure S7 (related to Figure 4). Single-cell analysis reveals yCSF induced remodeling of aged BM**

**(a-b)** t-SNE plot of skull BM cells from control and yCSF-treated mice.

- (c) Gene expression dotplots showing cell-type specific markers in skull BM cells.
- (d) Violin plots showing the expression of *Top2a*, *Il6*, and *Cdkn1a* in BM cells from control and yCSF-treated mice.
- (e) Violin plots showing the expression of *Spp1*, *Sp7*, *Lpl*, *Adipoq*, and *Cdkn1a* in stromal cells from control and yCSF-treated mice.
- (f) t-SNE plot of neutrophils and mature neutrophil subsets.
- (g) Dotplot analysis of subset-specific marker genes defining neutrophil subsets.
- (h) Proportion of CXCL2<sup>+</sup> and CXCR2<sup>+</sup>CD177<sup>+</sup> cells in mature neutrophils from control and yCSF-treated mice.
- (i) Violin plots showing the expression of *Cxcr2*, *Cxcl2*, and *Cd177* in CXCL2<sup>+</sup> and CXCR2<sup>+</sup>CD177<sup>+</sup> mature neutrophil subsets.
- (j) Violin plots showing *Mmp25* expression in mature neutrophils and the CXCR2<sup>+</sup>CD177<sup>+</sup> population in control and yCSF-treated mice.
- (k) Western blot analysis of p-P65, P65, p-IkBα, and IkBα protein levels in neutrophils isolated from aged (12M) mice 7 days after aCSF or yCSF treatment. Quantification of p-P65/P65 and p-IkBα/IkBα ratios is shown (right). *n* = 4.
- (l) ELISA quantification of IL1β and TNF in skull BM supernatant from aCSF and yCSF-treated mice. *n* = 5.



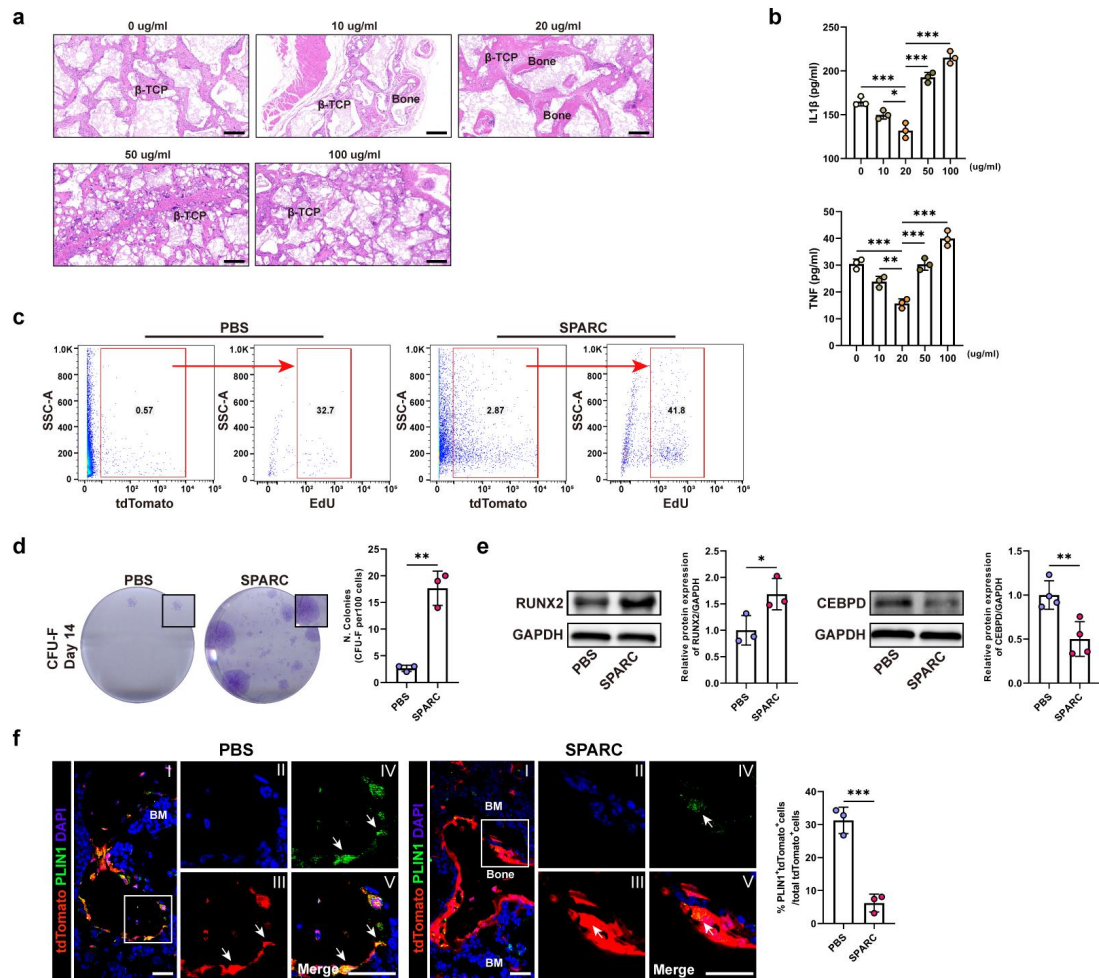

**Figure S8 (related to Figure 5). SPARC enhances the function of aged PDGFRA<sup>+</sup> cells**

**(a)** H&E staining of ectopic bone formation by PDGFRA<sup>+</sup> SSCs isolated from aged (12M) mice treated with different concentrations of SPARC (0, 10, 20, 50, 100 μg/mL) for 7 days, followed by subcutaneous transplantation with β-TCP scaffold for 4 weeks.

Scale bar, 100 μm. *n* = 3.

**(b)** ELISA quantification of IL1β and TNF in skull BM supernatant from aged (12M) mice treated with different concentrations of SPARC (0, 10, 20, 50, 100 μg/mL) for 7

d. *n* = 3.

**(c)** Representative flow cytometry plots showing tdTomato<sup>+</sup> and EdU<sup>+</sup> cells in *Pdgfra-CreER<sup>T2</sup>tdTomato* mice 72 hours after PBS or SPARC treatment.

**(d)** CFU-F analysis and quantification of PDGFRA<sup>+</sup> SSCs isolated from aged (12M) mice after 7-day SPARC treatment. *n* = 3.

**(e)** Western blot analysis and quantification of RUNX2 (e) and CEBPD (f) in PDGFRA<sup>+</sup> SSCs following 7-day SPARC treatment. *n* = 3 for RUNX2, and *n* = 4 for CEBPD.

**(f)** Representative immunofluorescence images of skull BM sections from PBS- or SPARC-treated aged (12M) *Pdgfra-CreER<sup>T2</sup>tdTomato* mice showing PLIN1 expression (green) in tdTomato<sup>+</sup> cells (red). quantification of PLIN1<sup>+</sup>tdTomato<sup>+</sup> double-positive cells as a percentage of total tdTomato<sup>+</sup> cells is presented (right). *n* = 3. Scale bar, 25 μm.

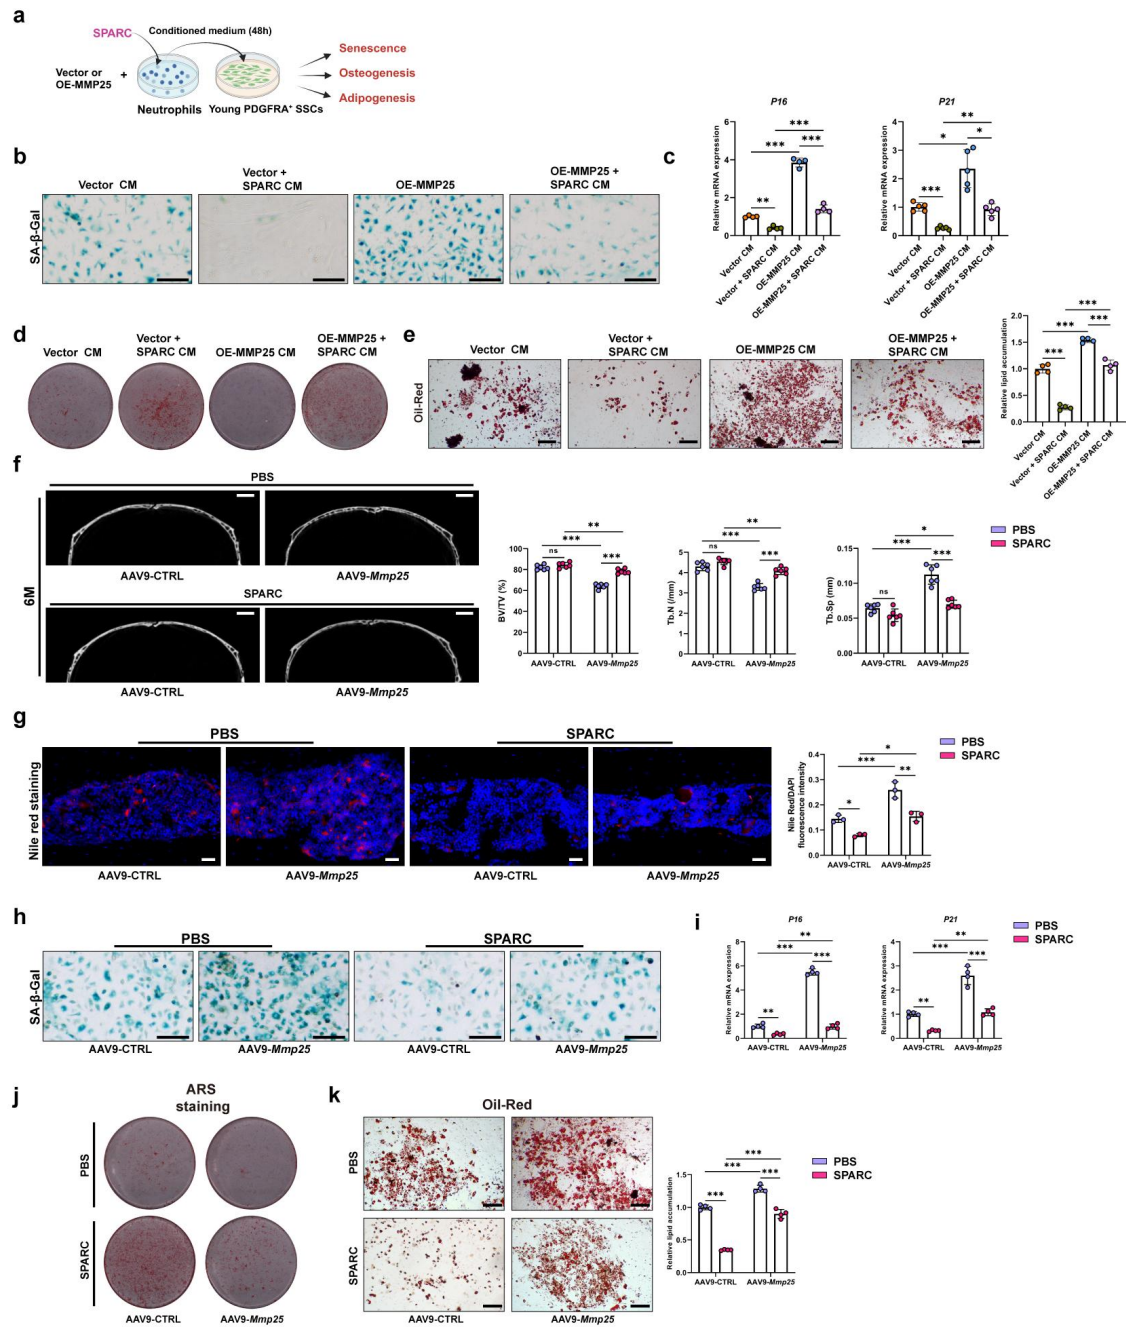

**Figure S9 (related to Figure 5). SPARC enhances the function of aged PDGFRA<sup>+</sup> cells**

(a) Schematic diagram showing the experimental design, where CM was collected from neutrophils isolated from 12-month-old mice, transfected with the vector or OE-MMP25, with or without SPARC treatment for 48 hours, followed by the analysis

of senescence, osteogenesis, and adipogenesis in young (1M) PDGFRA<sup>+</sup> SSCs.

**(b)** Representative SA- $\beta$ -Gal staining of senescent cells in young (1M) PDGFRA<sup>+</sup> SSCs treated with CM from neutrophils transfected with vector or OE-MMP25, with or without SPARC treatment.  $n = 3$ . Scale bar, 100  $\mu$ m.

**(c)** qPCR analysis of P16 ( $n = 4$ ) and P21 ( $n = 5$ ) mRNA expression in PDGFRA<sup>+</sup> SSCs cultured with different CM.

**(d)** ARS staining of osteogenic differentiation in young (1M) PDGFRA<sup>+</sup> SSCs treated with CM from the indicated neutrophil groups.

**(e)** Oil Red O staining and quantification of adipogenic differentiation in young (1M) PDGFRA<sup>+</sup> SSCs treated with CM from the indicated neutrophil groups.  $n = 4$ . Scale bar, 100  $\mu$ m.

**(f)** Representative  $\mu$ CT images (left) and quantification (right) of skull from 6M group mice following 2-month treatment with AAV9-CTRL or AAV9-*Mmp25* with or without SPARC treatment.  $n = 6$ . Scale bar, 1 mm.

**(g)** Representative images showing lipid accumulation by Nile red staining in skull BM from aged (12M) mice following 2-months of AAV9-CTRL or AAV9-*Mmp25* treatment, with or without SPARC. Quantification of Nile red/DAPI fluorescence intensity is shown on the right.  $n = 3$ . Scale bar, 50  $\mu$ m.

**(h)** SA- $\beta$ -Gal staining of senescent cells in PDGFRA<sup>+</sup> SSCs isolated from skull BM of aged mice treated with AAV9-CTRL or AAV9-*Mmp25* with or without SPARC.  $n = 3$ . Scale bar, 100  $\mu$ m.

**(i)** qPCR analysis of *P16* and *P21* mRNA expression in PDGFRA<sup>+</sup> SSCs isolated

from skull BM of aged mice treated with AAV9-CTRL or AAV9-*Mmp25* with or without SPARC.  $n = 4$ .

**(j)** ARS staining of osteogenic differentiation in PDGFRA<sup>+</sup> SSCs isolated from skull BM of aged mice treated with AAV9-CTRL or AAV9-*Mmp25* with or without SPARC.

**(k)** Oil-red-O staining of adipogenic differentiation in PDGFRA<sup>+</sup> SSCs isolated from skull BM of aged mice treated with AAV9-CTRL or AAV9-*Mmp25* with or without SPARC.  $n = 3$ . Scale bar, 100  $\mu\text{m}$ .

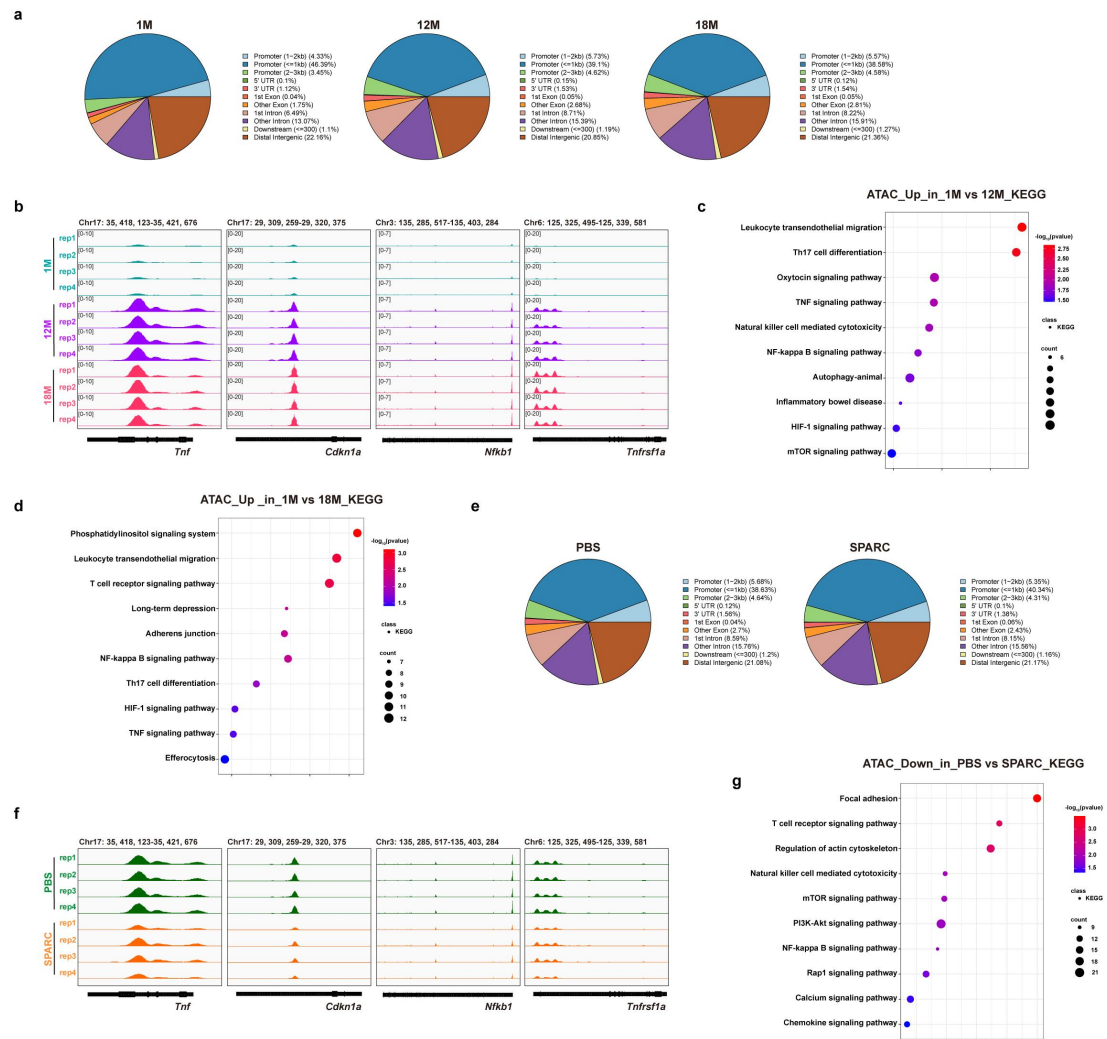

**Figure S10 (related to Figure 6). Chromatin accessibility changes in skull neutrophils during aging and following SPARC intervention**

(a) Pie chart showing the distribution of ATAC-seq peaks identified in neutrophils from 1-, 12-, and 18-month-old mice.

(b) Representative ATAC-seq tracks of the *Tnf*, *Cdkn1a*, *Nfkb1*, and *Tnfrsf1a* loci in skull neutrophils of 1-, 12-, and 18-month-old mice.

(c) KEGG pathway analysis of ATAC-seq peaks that were increased in 12-month-old mice compared to 1-month-old mice.

**(d)** KEGG pathway analysis of ATAC-seq peaks that were increased in 18-month-old mice compared to 1-month-old mice.

**(e)** Pie chart showing the distribution of ATAC-seq peaks identified in neutrophils of aged mice treated with PBS or SPARC for 7 days.

**(f)** Representative ATAC-seq tracks of the *Tnf*, *Cdkn1a*, *Nfkb1*, and *Tnfrsf1a* loci in skull neutrophils of aged mice treated with PBS or SPARC for 7 days.

**(g)** KEGG pathway analysis of ATAC-seq peaks that were decreased in SPARC-treated mice compared to PBS-treated mice.

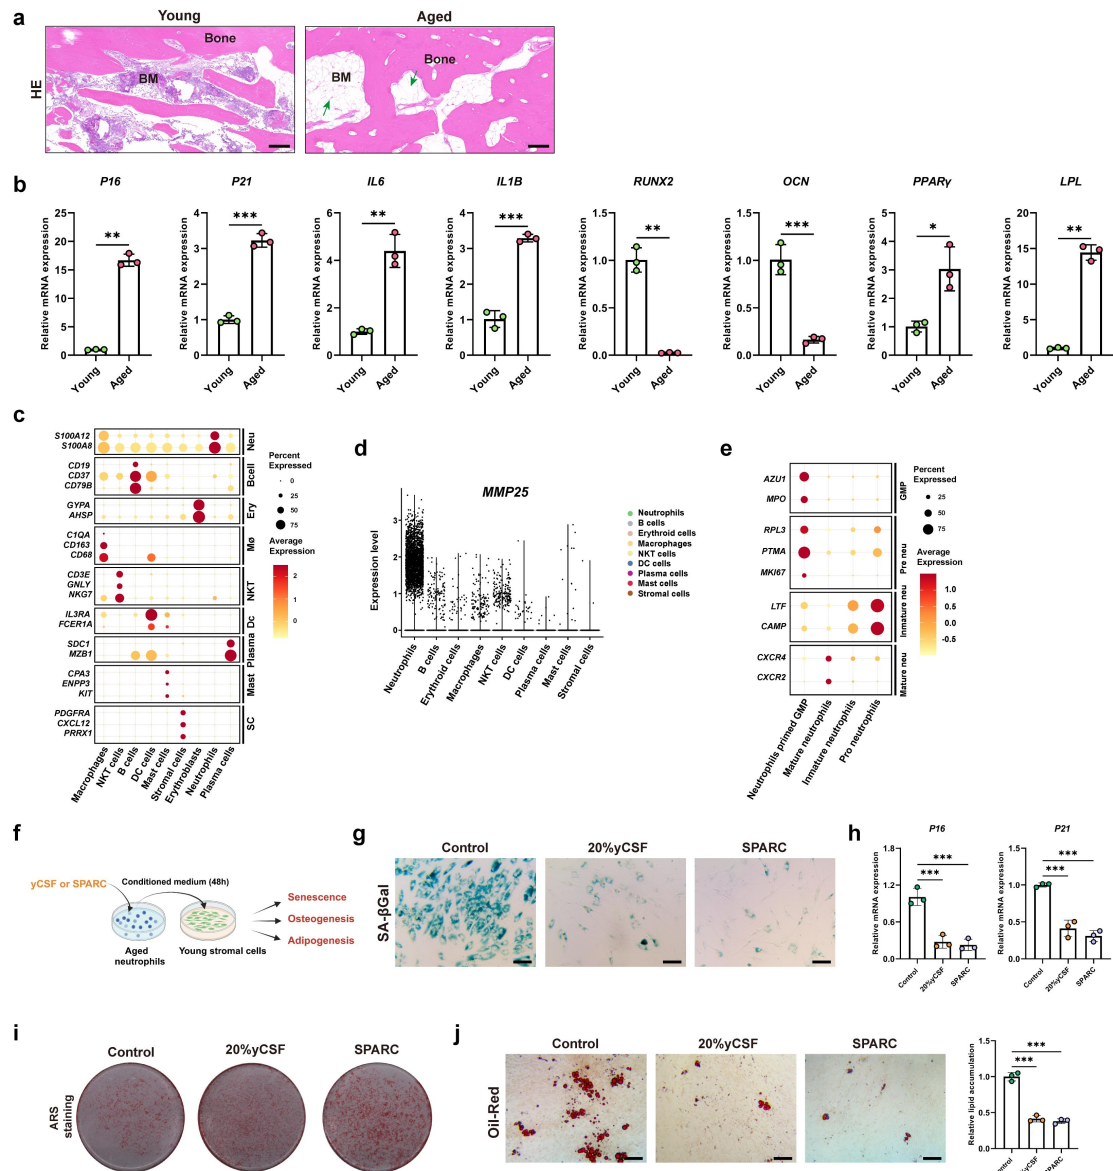

**Figure S11 (related to Figure 7). SPARC and yCSF revitalize aged human BM**

**(a)** Representative H&E staining of young and aged human skull sections. Green arrows indicate adipose vacuoles in the BM. Scale bar, 200  $\mu$ m.

**(b)** qPCR analysis of senescence-associated (*P16*, *P21*), inflammatory (*IL6*, *IL1B*), osteogenic (*RUNX2*, *OCN*), and adipogenic (*PPAR $\gamma$* , *LPL*) genes in BM cells from young and aged individuals.  $n = 3$ .

**(c)** Gene expression dotplots showing cell-type specific markers in human skull BM



cells.

**(d)** Violin plots showing the expression of *MMP25* across different cell populations.

**(e)** Dotplot analysis of subset-specific marker genes defining human neutrophil subsets.

**(f)** Schematic diagram showing the CM collected from aged neutrophils treated with yCSF or SPARC, followed by functional analysis of BM stromal cells isolated from young individuals. Created in BioRender.

**(g)** Representative SA- $\beta$ -Gal staining of senescent cells in young stromal cells treated with CM from aged neutrophils with indicated treatments.  $n = 3$ . Scale bar, 100  $\mu$ m.

**(h)** qPCR analysis of *P16* and *P21* mRNA expression in young stromal cells treated with different CM.  $n = 3$ .

**(i)** ARS staining of osteogenic differentiation in young stromal cells treated with CM from aged neutrophils with indicated treatments.

**(j)** Oil Red O staining and quantification of adipogenic differentiation in young stromal cells treated with CM from aged neutrophils with indicated treatments.  $n = 3$ .
